# Supplementary material for: Protein nanoarrays using the annexin A5 two-dimensional crystal on supported lipid bilayers
Source: Royal Society of Chemistry journal article supplement (doi:10.1039/d3na00335c), 2023-01-01
Supplement: d3na00335c1.pdf [file d3na00335c1.pdf]

# Protein nanoarray using annexin A5 two-dimensional crystal on supported lipid bilayers

Hiroaki Kominami, Yoshiki Hirata, Hirofumi Yamada and Kei Kobayashi\*

\*Email: keicoba@iic.kyoto-u.ac.jp

## Supporting Information

### **Incubation time dependence of formation of 2D annexin A5 crystals.**

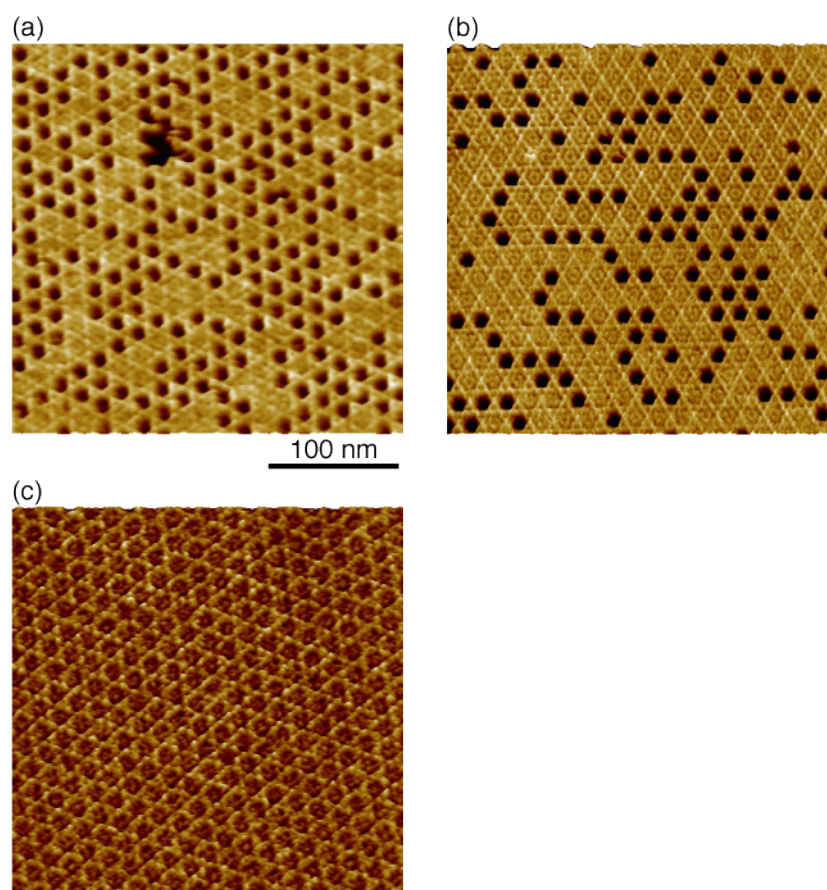

**Fig. S1.** FM-AFM images of 2D annexin A5 crystals in 10 mM HEPES (pH 7.5) containing of 150 mM NaCl and 10 mM  $\text{CaCl}_2$ . Incubation time (from dropping annexin A5 solution to rinse the sample): 5 minutes (a), 20 minutes (b), and 3 hours (c).

### Density of unoccupied hollow sites in the 2D annexin A5 crystal.

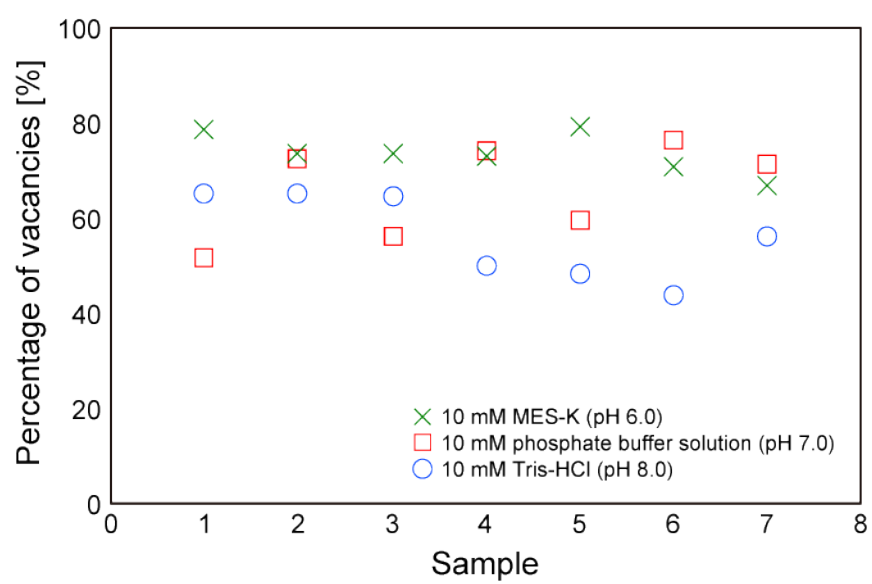

**Fig. S2.** Percentage of vacancies (unoccupied hollow sites) of the 2D annexin A5 crystal.
